# Supplementary material for: Teacher-Related Factors as Predictors of Students’ Achievement in English Grammar in Gambian Senior Secondary Schools
Source: Hindawi journal article supplement (doi:10.1155/2020/8897719), 2020-11-07
Supplement: f1 [file 8897719.f1.doc]

**TEACHERS’ QUESTIONNAIRE ON PEDAGOGICAL FACTORS IN TEACHING (TQPFIT)**

Dear English Language Teachers,

This questionnaire is designed to assess the relationship between some teacher-related attributes such as subject mastery, and questioning behaviour and effective teaching/ ESL students’ achievement in English grammar. Objectivity is required because whatever information you give will be used solely for the purpose of research. Kindly provide the necessary information below and you are implored to be sincere. Thank you.

**SECTION A**

School: ……………………………………………………………………….................................

Region .........................................................................................……………….....................

Highest Qualification: ……………………………………………Years of experience: .................

S**ECTION B**

Please tick (√) the option that most applies to you from the following: ***Frequently, Occasionally, Rarely and Never***.

| **No.** | **Items on Subject Mastery** | **Frequently 4** | **Occasionally 3** | **Rarely 2** | **Never 1** |
| --- | --- | --- | --- | --- | --- |
| 1 | I teach grammar lessons weekly. |  |  |  |  |
| 2 | I can confidently and effectively teach English grammar to my students. |  |  |  |  |
| 3 | I have a sound mastery of the grammar rules in English language. |  |  |  |  |
| 4 | I update my knowledge from time to time by reading grammar textbooks. |  |  |  |  |
| 5 | I go online to read current or new changes in English grammar and I consequently update my old notes to teach my students. |  |  |  |  |
| 6 | I can confidently and effectively teach English grammar. |  |  |  |  |
| 7 | I can’t teach grammar rules because they are complicated. |  |  |  |  |
| 8 | I always read and stress the importance of grammar rules in ESL classroom instruction. |  |  |  |  |
| 9 | I am comfortable with teaching grammar because the rules are too many. |  |  |  |  |
| 10 | I teach English grammar very well. |  |  |  |  |

| **No.** | **Items on Questioning Behaviour** | **Frequently** | **Occasionally** | **Rarely** | **Never** |
| --- | --- | --- | --- | --- | --- |
| 11 | I consider questioning as an integral part of instruction in English grammar. |  |  |  |  |
| 12 | I randomly select students to answer questions during lessons. |  |  |  |  |
| 13 | I direct my questions to the entire class and encourage all to participate during instruction. |  |  |  |  |
| 14 | I ask different types of questions in the course of my lesson. |  |  |  |  |
| 15 | I ask follow-up questions to require evidence as support for students’ answer. |  |  |  |  |
| 16 | I call on specific students to answer questions. |  |  |  |  |
| 17 | I prefer to ask open-ended questions. |  |  |  |  |
| 18 | I explain or modify my question when it is not understood by the students. |  |  |  |  |
| 19 | I task non-volunteers to answer my questions. |  |  |  |  |
| 20 | I repeat my questions when there is no response. |  |  |  |  |
